# Supplementary material
Source: PubMed Central journal article supplement (PMC3268685)

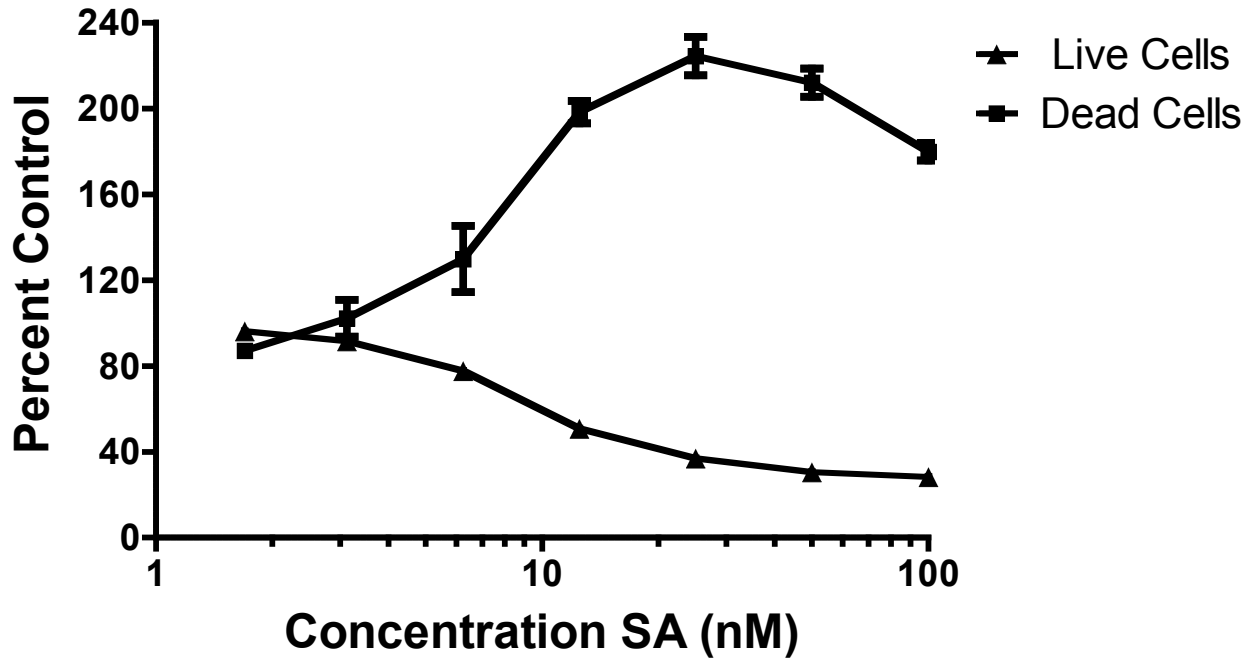

**A**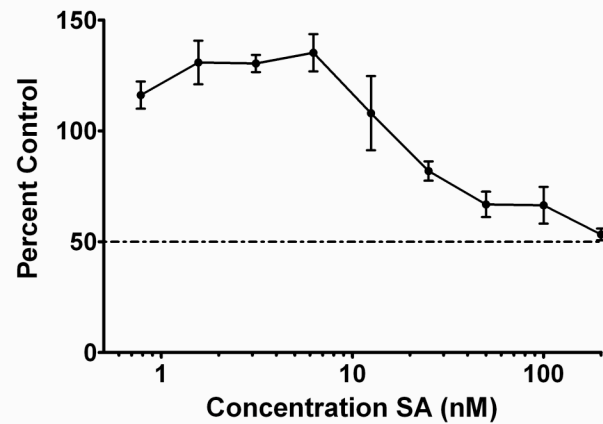**B**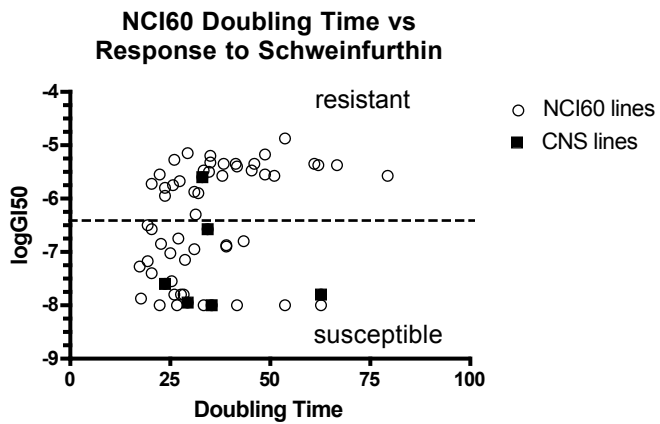**C****DMSO**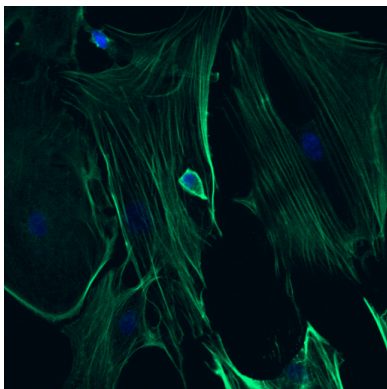**10 nM**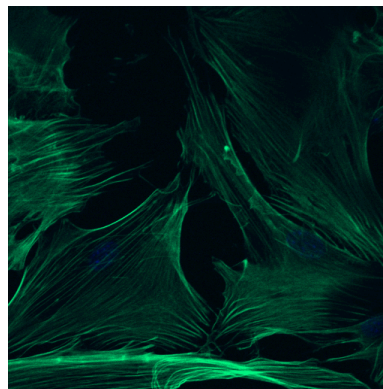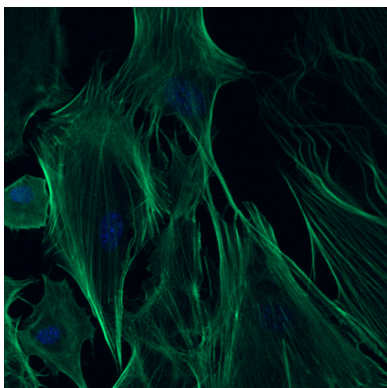**100 nM**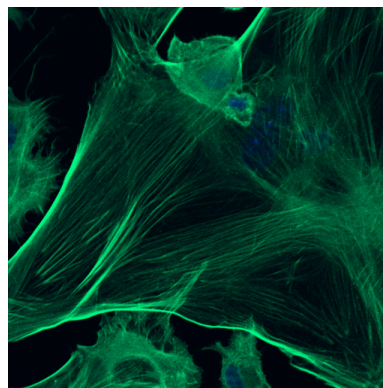**1000 nM**

A

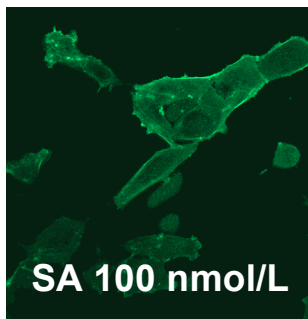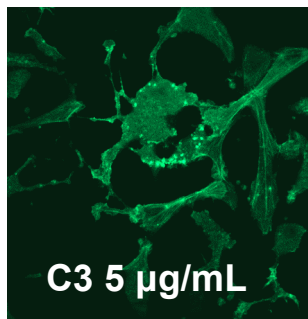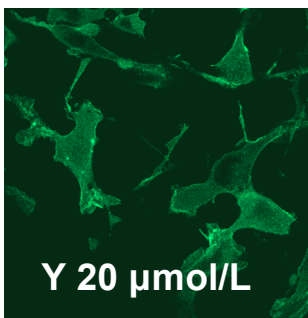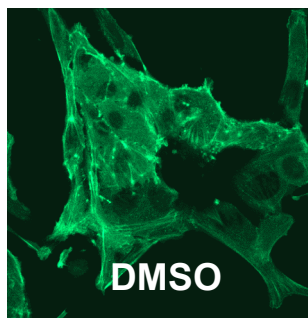

B

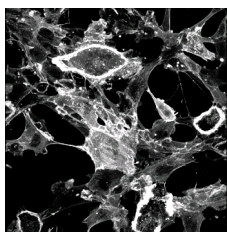

0 hrs

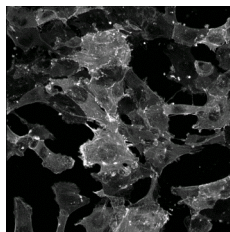

4 hrs

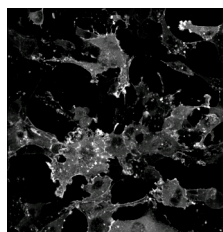

12 hrs

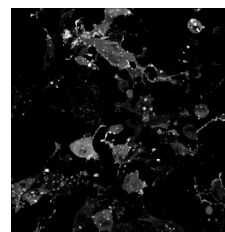

16 hrs

C

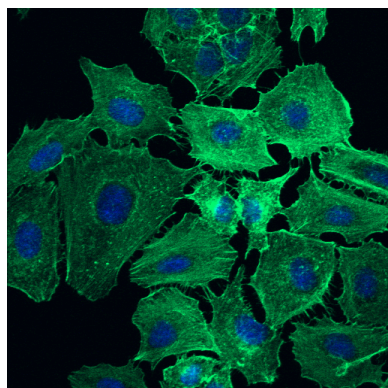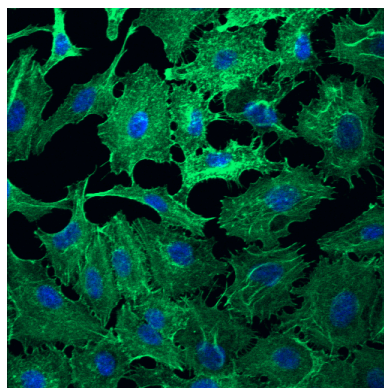

KR158

SF295

A549

NF1

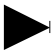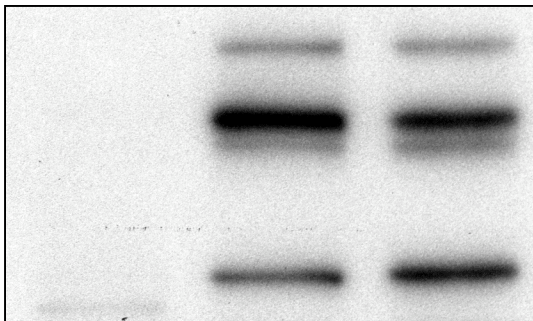

250 KD

Tubulin

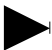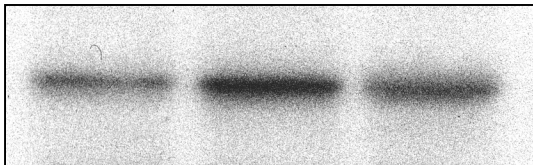

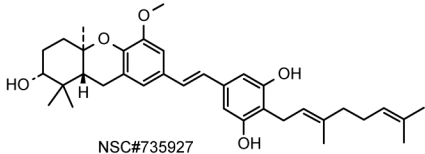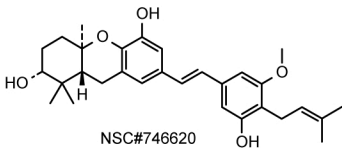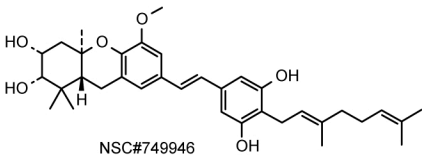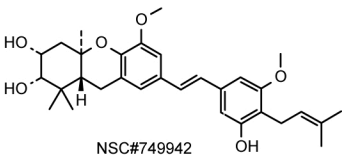

# K14553

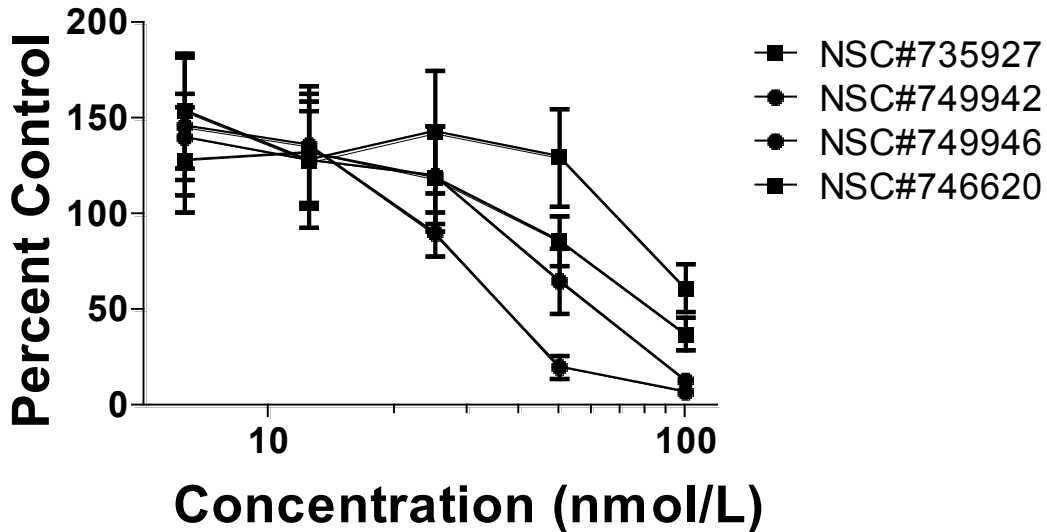

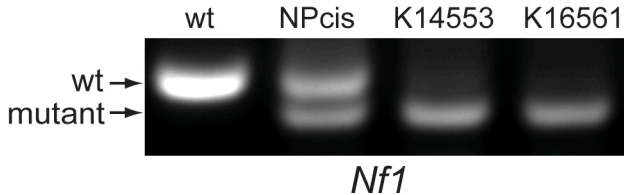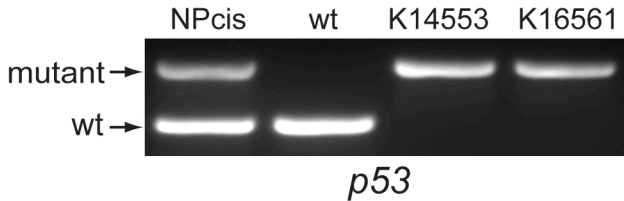

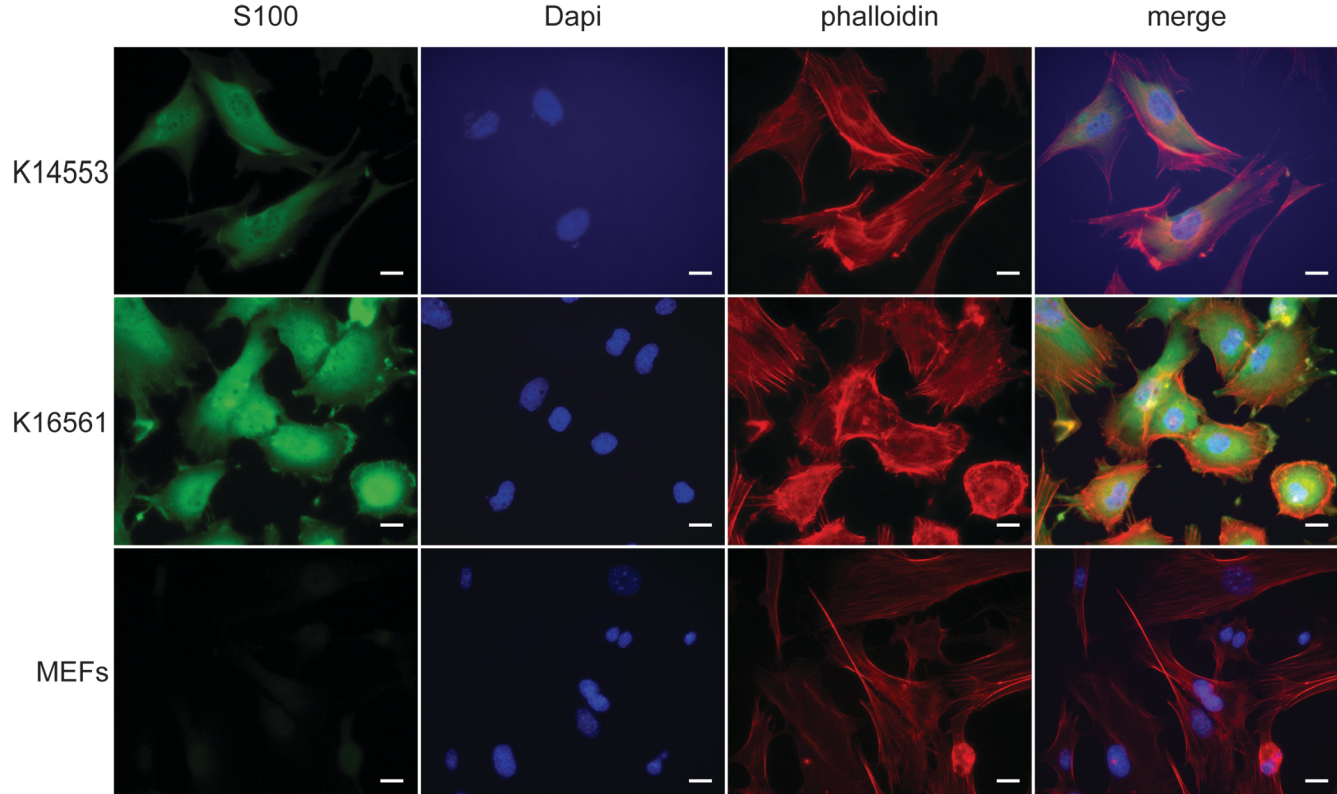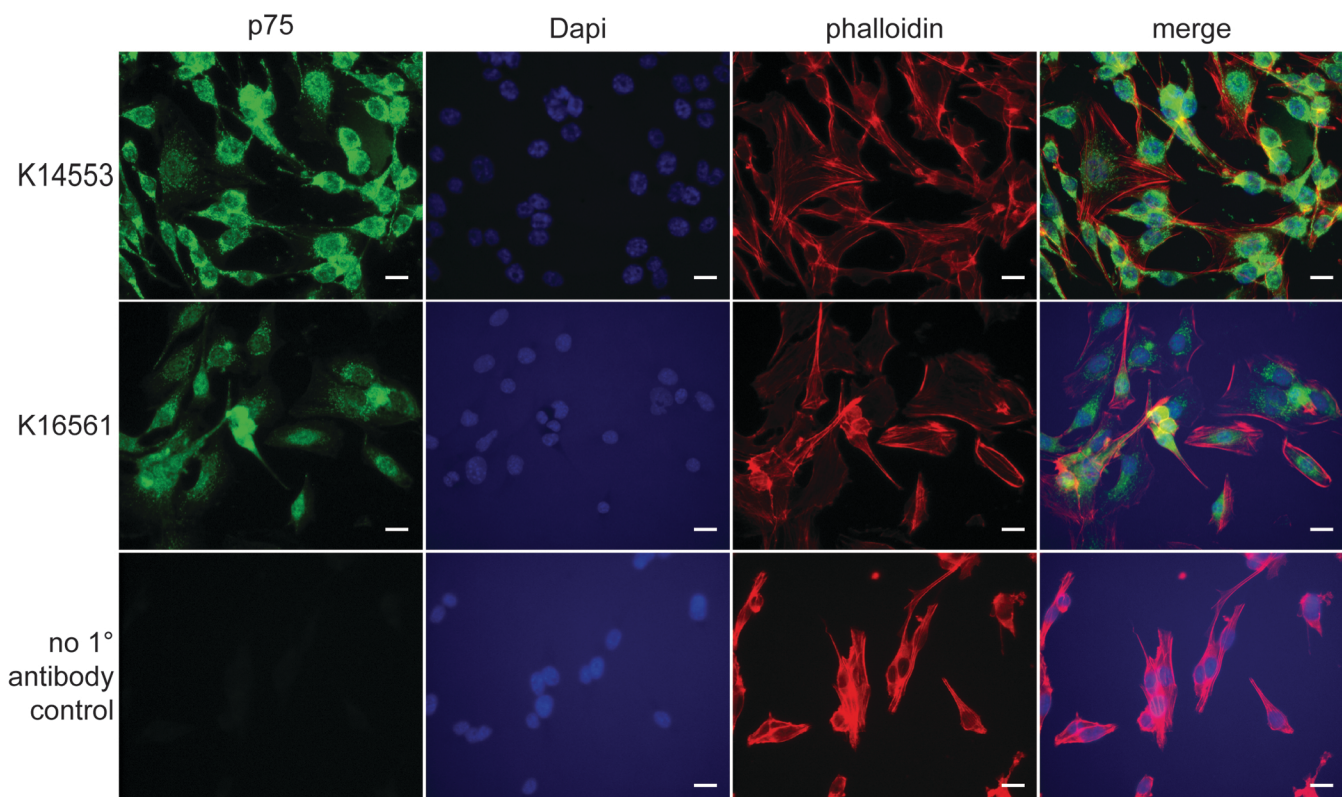



MyoD1

phalloidin

merge

K14553

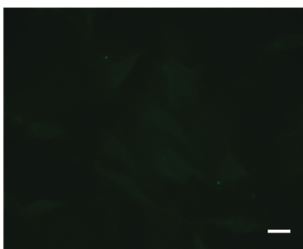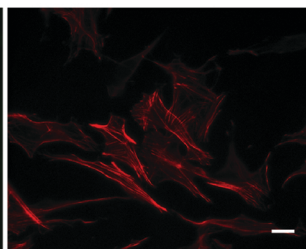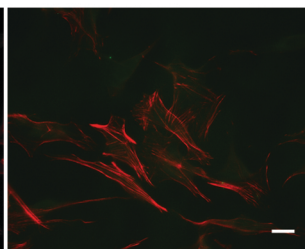

K16561

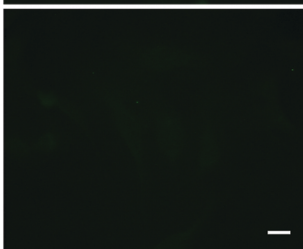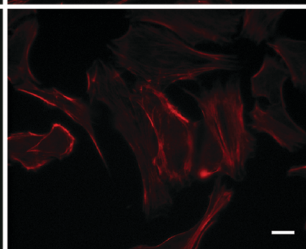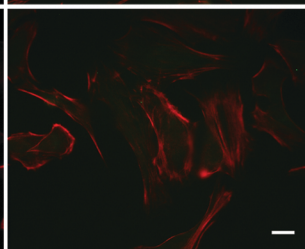

RD

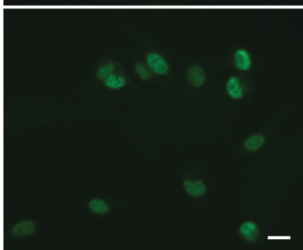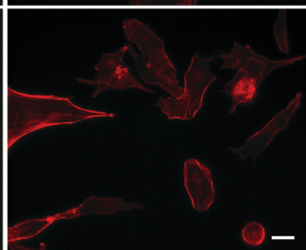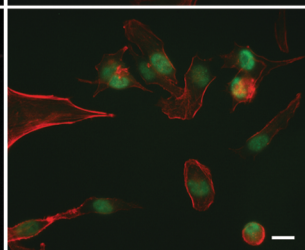

Myf4

phalloidin

merge

K14553

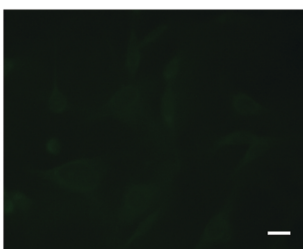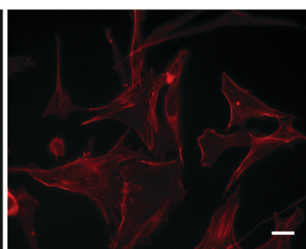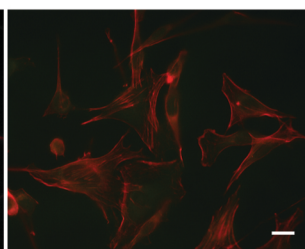

K16561

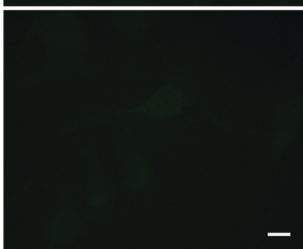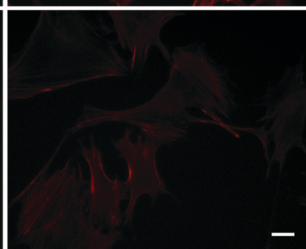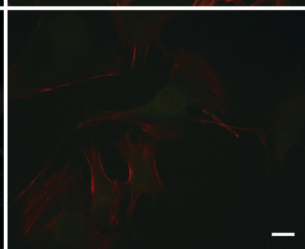

RD

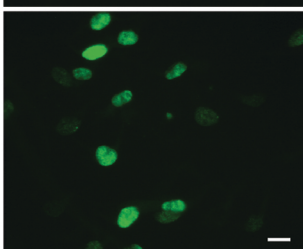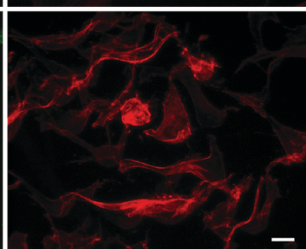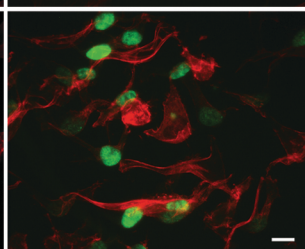

Supplement: NIHMS187633-supplement-2.pdf [file NIHMS187633-supplement-2.pdf]
